# Supplementary material
Source: PubMed Central journal article supplement (PMC6596434)
Supplement: JCOPDF-6-132-s001.pdf [file JCOPDF-6-132-s001.pdf]

## Supplemental Table 1. Methods of recruitment.

| Recruitment Avenue                                           | <sup>a</sup> Direct Reach                 |
|--------------------------------------------------------------|-------------------------------------------|
| COPD PPRN Individual Email Invitation                        | 3,905                                     |
| COPD PPRN Post Newsletter                                    | 3,905                                     |
| C.O.P.D. Information Line Calls to COPD<br>PPRN Participants | 1,480                                     |
| 2 Facebook Posts on COPDF Facebook<br>Page                   | 72,840<br>(Ad #1 48,314; Ad #2<br>24,526) |
| Blurb in COPDF's Faces of COPD e-<br>newsletter              | 37,731                                    |
| Posts on COPD360social                                       | 30,583                                    |
| COPD State Captains                                          | 34                                        |

<sup>a</sup> These are not independent numbers since many individuals received multiple types of study contact.

## Supplemental Table 2. Screening Questionnaire.

|                                                                                                                                                                                                                                                                                                                           |
|---------------------------------------------------------------------------------------------------------------------------------------------------------------------------------------------------------------------------------------------------------------------------------------------------------------------------|
| <p><b>1.) Have you ever been diagnosed with a breathing condition called Chronic Obstructive Pulmonary Disease – also called COPD, chronic bronchitis or emphysema?</b></p> <p>Format: (yes/no)<br/>Yes = Eligible No= Ineligible</p>                                                                                     |
| <p><b>2.) In the last 4 months (120 days), have you been told you had pneumonia by a healthcare provider (doctor, nurse, etc.)?</b></p> <p>Format: (yes/no)<br/>Yes = Eligible No= Ineligible</p>                                                                                                                         |
| <p><b>3.) When were you most recently told that you had pneumonia by a healthcare provider (doctor, nurse, etc.) Give date in mm/dd/yyyy format. (If unsure of the exact date, make your best estimate).</b></p> <p>Within 4 months of current date = Eligible<br/>Earlier than 4 months of current date = Ineligible</p> |

### Supplemental Table 3. Days until symptom resolution<sup>§</sup> among participants who reported at least one day with pneumonia symptoms

|                                                            | N   | Hospitalized<br>with Pneumonia<br>Mean (SD)<br>Median [Q1, Q3] | Non-hospitalized<br>with Pneumonia<br>Mean (SD)<br>Median [Q1, Q3] | Age <50<br>Mean (SD)<br>Median<br>[Q1, Q3] | Age 50-64<br>Mean (SD)<br>Median<br>[Q1, Q3] | Age ≥65<br>Mean (SD)<br>Median<br>[Q1, Q3] |
|------------------------------------------------------------|-----|----------------------------------------------------------------|--------------------------------------------------------------------|--------------------------------------------|----------------------------------------------|--------------------------------------------|
| <b>Tiredness</b>                                           | 473 | 26.4 (26.3)<br>21 [14, 30]                                     | 36.3 (38.6)<br>30 [7, 36.5]                                        | 24.6 (23.9)<br>21 [14, 21]                 | 26.5 (26.7)<br>21 [14, 30]                   | 44.4 (41.7)<br>30 [7, 71]                  |
| <b>Weakness</b>                                            | 472 | 28.7 (27.5)<br>21 [14, 30]                                     | 33.0 (38.4)<br>21 [7, 34]                                          | 26.2 (25.7)<br>21 [14, 21]                 | 29.3 (26.9)<br>21 [14, 30]                   | 45.5 (42.3)<br>30 [14, 62]                 |
| <b>Dyspnea</b>                                             | 467 | 34.8 (37.5)<br>21 [14, 30]                                     | 42.3 (44.4)<br>25.5 [7, 61]                                        | 33.5 (36.1)<br>14 [14, 30]                 | 36.5 (39.7)<br>21 [14, 34.5]                 | 44.1 (44.5)<br>30 [7, 76]                  |
| <b>Cough<sup>c, f</sup></b>                                | 465 | 45.5 (41.6)<br>21 [14, 80.5]                                   | 18.8 (24.4)<br>7 [7, 21]                                           | 53.7 (42.8)<br>30 [14, 95]                 | 31.1 (34.9)<br>21 [14, 30]                   | 17.4 (24.0)<br>7 [2, 29]                   |
| <b>Thick Mucus or Phlegm with<br/>Cough<sup>b, f</sup></b> | 461 | 39.4 (39.0)<br>21 [14, 60]                                     | 19.3 (21.6)<br>14 [7, 21]                                          | 45.5 (40.4)<br>30 [14, 77]                 | 29.9 (34.3)<br>21 [14, 30]                   | 14.3 (15.4)<br>7 [7, 21]                   |
| <b>Body Aches or Pains</b>                                 | 460 | 18.7 (24.3)<br>14 [7, 21]                                      | 24.2 (30.7)<br>14 [7, 30]                                          | 18.1 (24.5)<br>14 [7, 21]                  | 17.9 (20.1)<br>14 [7, 21]                    | 30.4 (37.8)<br>14 [7, 44]                  |
| <b>Pain from Coughing<sup>f</sup></b>                      | 443 | 21.0 (29.4)<br>14 [7, 21]                                      | 20.9 (33.3)<br>7 [2, 25.5]                                         | 19.7 (28.9)<br>7 [7, 21]                   | 25.3 (31.7)<br>14 [7, 21]                    | 11.0 (22.2)<br>7 [2, 7]                    |
| <b>Wheezing</b>                                            | 441 | 34.9 (36.5)<br>21 [14, 30]                                     | 31.9 (38.5)<br>14 [7, 30]                                          | 37.0 (37.3)<br>21 [14, 59]                 | 31.7 (35.9)<br>14 [14, 30]                   | 27.9 (33.8)<br>14 [7, 31]                  |
| <b>Fever<sup>c, f</sup></b>                                | 437 | 14.9 (20.3)<br>7 [7, 14]                                       | 7.1 (6.8)<br>7 [2, 7]                                              | 14.9 (20.3)<br>7 [7, 14]                   | 15.5 (20.1)<br>14 [7, 17.5]                  | 4.1 (6.1)<br>1 [1, 7]                      |
| <b>Weak Appetite</b>                                       | 433 | 26.3 (36.7)<br>14 [7, 21]                                      | 25.3 (37.5)<br>14 [7, 21]                                          | 27.3 (37.8)<br>14 [7, 21]                  | 25.9 (36.9)<br>14 [7, 21]                    | 18.9 (26.5)<br>14 [2, 21]                  |
| <b>Trouble Sleeping<sup>a, f</sup></b>                     | 432 | 47.3 (44.7)<br>21 [14, 90]                                     | 34.3 (38.1)<br>14 [7, 58]                                          | 54.1 (45.6)<br>30 [14, 102]                | 33.4 (39.0)<br>14 [7, 30]                    | 36 (40.3)<br>21 [7, 54]                    |
| <b>Sweat<sup>a, e</sup></b>                                | 427 | 15.4 (23.5)<br>7 [7, 14]                                       | 11.7 (23.8)<br>7 [2, 7]                                            | 15 (22.6)<br>7 [7, 14]                     | 16.1 (24.3)<br>7 [7, 14]                     | 12.5 (30.1)<br>2 [1, 7]                    |
| <b>Chills<sup>a, f</sup></b>                               | 414 | 16.9 (27.7)<br>7 [2, 14]                                       | 12.6 (26.2)<br>2 [2, 7]                                            | 15.7 (27.0)<br>7 [2, 14]                   | 20.1 (28.9)<br>14 [7, 21]                    | 7.6 (25.8)<br>1 [1, 2]                     |
| <b>Headaches</b>                                           | 358 | 11.4 (11.6)<br>7 [7, 14]                                       | 17.4 (25.9)<br>7 [7, 14]                                           | 11.1 (11.5)<br>7 [2, 14]                   | 11.4 (6.7)<br>10.5 [7, 14]                   | 27.0 (44.4)<br>7 [2, 30]                   |
| <b>Confusion/Trouble Thinking</b>                          | 296 | 13.0 (16.5)<br>7 [2, 14]                                       | 28.9 (40.6)<br>10.5 [2, 34.5]                                      | 12.2 (15.5)<br>7 [2, 14]                   | 14.4 (16.8)<br>7 [7, 21]                     | 29.4 (43.2)<br>7 [2, 30]                   |
| <b>Gastrointestinal<sup>d</sup></b>                        | 278 | 7.6 (8.7)<br>7 [2, 7]                                          | 9.1 (8.2)<br>7 [2, 14]                                             | 7.6 (10.0)<br>7 [2, 7]                     | 8.4 (6.2)<br>7 [7, 7]                        | 5 (2.6)<br>7 [2, 7]                        |

<sup>§</sup> For those without symptom resolution- time from CAP diagnosis till last survey

For stratification by hospitalization status: <sup>a</sup> p<0.05; <sup>b</sup> p<0.01; <sup>c</sup> p<0.001. For stratification by age group: <sup>d</sup> p<0.05; <sup>e</sup> p<0.01; <sup>f</sup> p<0.001.
